# Supplementary material for: Multimodal Analgesia Bundle and Postoperative Opioid Use Among Patients Undergoing Colorectal Surgery
Source: PubMed Central journal article supplement (PMC10483316; doi:10.1001/jamanetworkopen.2023.32408), 2023-09-06
Supplement: jamanetwopen-e2332408-s001.pdf [file jamanetwopen-e2332408-s001.pdf]

## Data Sharing Statement

Gedda. Multimodal Analgesia Bundle and Postoperative Opioid Use Among Patients Undergoing Colorectal Surgery. *JAMA Netw Open*. Published September 06, 2023. doi:10.1001/jamanetworkopen.2023.32408

### Data

**Data available:** No
